# Supplementary material
Source: PubMed Central journal article supplement (PMC4793458)
Supplement: lite011963.ww1_default.pdf [file lite011963.ww1_default.pdf]

**Appendix 1** Description of Included Studies [posted as supplied by author]

| Name           | Year | N   | Category              | Iron Type      | Dose Schedule                                                  | Control                                             | ESA              | Outcomes Measures |       |        |      |       | Follow Up (weeks)                                         |    |
|----------------|------|-----|-----------------------|----------------|----------------------------------------------------------------|-----------------------------------------------------|------------------|-------------------|-------|--------|------|-------|-----------------------------------------------------------|----|
|                |      |     |                       |                |                                                                |                                                     |                  | Hb                | Trans | Infect | Mort | Other |                                                           |    |
| 1 Adhikary, L  | 2011 | 90  | Renal                 | Sucrose        | 200mg alternate days for 5 doses                               | Oral iron, ferrous fumarate 125mg three times daily | Yes, both groups | Y                 |       |        |      |       | Anaphylaxis                                               | 4  |
| 2 Agarwal, R   | 2006 | 75  | Renal                 | Gluconate      | 250mg weekly, total dose 10mg/kg                               | Oral iron                                           | No               | Y                 |       |        |      |       | AE, SAE, Anaphylaxis, Mortality                           | 10 |
| 3 Aggarwal, HK | 2003 | 40  | Renal                 | Dextran        | 100mg every 2 weeks                                            | Oral iron                                           | Yes, both groups | Y                 |       |        |      |       | SAE, Anaphylaxis                                          | 12 |
| 4 Al, RA       | 2005 | 90  | Obstetrics            | Sucrose        | Ganzoni formula. Max 400mg/day over 5 days. Total dose 11mg/kg | Oral iron polymaltose                               | No               | Y                 | Y     |        |      |       | SAE, Anaphylaxis, Iron studies, Fetal birth weight        | 10 |
| 5 Al-Momen, AK | 1996 | 111 | Obstetrics            | Sucrose        | Calculated from body weight                                    | Oral iron ferrous sulphate                          | No               | Y                 |       |        |      |       | AE, Anaphylaxis                                           | 15 |
| 6 Allen, RP    | 2011 | 46  | Restless leg syndrome | Carboxymaltose | 500mg twice, 2 days apart                                      | Placebo                                             | No               |                   |       | Y      |      |       | IRLS restless leg score                                   | 4  |
| 7 Anker, SD    | 2009 | 459 | Heart failure         | Carboxymaltose | Ganzoni Formula, 200mg weekly till replete                     | Placebo                                             | No               | Y                 |       | Y      | Y    |       | Self-reported patient global assessment, SAE, Anaphylaxis | 26 |
| 8 Auerbach, M  | 2004 | 157 | Oncology              | Dextran        | Total dose infusion or 100mg repeated                          | Oral iron group and no iron group                   | Yes, both        | Y                 | Y     |        | Y    |       | AE, Anaphylaxis                                           | 6  |
| 9 Auerbach, M  | 2010 | 243 | Oncology              | Dextran        | 50mg per dose, three weekly for 12 weeks                       | Oral iron or no iron                                | Yes, both groups | Y                 | Y     |        | Y    |       | Functional assessment, AE, SAE, Anaphylaxis               | 15 |
| 10 Bastit, L*  | 2008 | 396 | Oncology              | Sucrose        | 200mg every 3                                                  | Standard care,                                      | Yes,             | Y                 | Y     | Y      | Y    |       | QOL, SAE,                                                 | 16 |

|                     |      |     |                      |                       |                                                                       |                                                 |           |   |   |   |                                         |       |
|---------------------|------|-----|----------------------|-----------------------|-----------------------------------------------------------------------|-------------------------------------------------|-----------|---|---|---|-----------------------------------------|-------|
| 11 Bayoumeu, F      | 2002 | 50  | Obstetrics           | Sucrose               | weeks Lorentz Formula                                                 | no iron Oral iron sulphate                      | Both No   | Y | Y |   | Anaphylaxis SAE, Anaphylaxis            | 4     |
| 12 Beck-Da-Silva, L | 2013 | 23  | Cardiac failure      | Sucrose               | 200mg weekly for 5 weeks                                              | Oral ferrous sulphate 200mg three times per day | No        | Y |   |   | VO2 max                                 | 13    |
| 13 Benacaiova, G    | 2009 | 260 | Obstetrics           | Sucrose               | 200mg twice or three times                                            | Oral ferrous sulphate                           | No        | Y | Y | Y | Iron studies, SAE                       | 20-25 |
| 14 Bhandal, N       | 2006 | 44  | Obstetrics           | Sucrose               | 200mg two days apart                                                  | Oral ferrous sulphate                           | No        | Y | Y |   | SAE, Anaphylaxis                        | 5     |
| 15 Birgregard, G    | 2010 | 120 | Healthy blood donors | Sucrose               | 200mg after each donation                                             | Oral ferrous sulphate                           | No        |   |   |   | Iron studies, AE, SAE, Anaphylaxis, RLS | 8-52  |
| 16 Breymann, C      | 2008 | 349 | Obstetrics           | Carboxymaltose        | 15mg/kg to max of 1000mg weekly up to 3 doses, mean total dose 1347mg | Oral ferrous sulphate                           | No        | Y | Y | Y | AE, SAE, Anaphylaxis                    | 12    |
| 17 Charytan, C      | 2005 | 96  | Renal                | Sucrose               | 200mg weekly for 5 doses                                              | Oral ferrous sulphate                           | No        | Y |   | Y | SAE, Anaphylaxis, Iron studies          | 5     |
| 18 Coyne, DW        | 2007 | 134 | Renal                | Gluconate             | 125mg 3 times a week for 8 doses                                      | No iron                                         | Yes, Both | Y |   | Y | SAE, Iron studies                       | 6     |
| 19 Danguwan, P      | 2010 | 44  | Oncology             | Sucrose               | 200mg                                                                 | Oral ferrous sulphate                           | No        | Y | Y |   | SAE, Anaphylaxis                        | 2     |
| 20 Edwards, TJ      | 2009 | 62  | Colorectal surgery   | Sucrose               | 300mg twice (BMI)                                                     | Placebo                                         | No        | Y | Y |   | LOS hospital                            | 2     |
| 21 Evstatiev, R     | 2013 | 256 | Gastrointestinal     | Ferric carboxymaltose | 500mg per dose, median dose 1000mg                                    | Placebo                                         | No        | Y |   | Y | SAE                                     | 34    |
| 22 Friel, JK        | 1995 | 26  | Neonatal TPN         | Dextran               | 200mcg/kg/ day                                                        | No iron                                         | No        |   | Y | Y |                                         | 8     |
| 23 Froessler, B     | 2013 | 271 | Obstetric            | Sucrose               | 200mg twice, minimum 24 hours apart                                   | Oral ferrous iron sulphate 500mg daily          | No        | Y | Y |   | AE                                      | 7     |
| 24 Garrido-         | 2012 | 210 | Cardiothor           | Sucrose               | Three doses of                                                        | Oral iron                                       | No        | Y | Y |   | SAE                                     | 4     |

|                     |      |     |                                   |              |                                                       |                                            |                                          |   |   |   |   |  |                            |     |
|---------------------|------|-----|-----------------------------------|--------------|-------------------------------------------------------|--------------------------------------------|------------------------------------------|---|---|---|---|--|----------------------------|-----|
| Martin, P           |      |     | acic Surgery                      |              | 100mg each                                            | ferrous fumarate 105mg or placebo, Placebo |                                          |   |   |   |   |  |                            |     |
| 25 Grote, L*        | 2009 | 60  | Restless Leg Syndrome             | Sucrose      | 200mg, 5 doses over 3 weeks                           |                                            | No                                       | Y |   | Y |   |  | RLS score, AE, Anaphylaxis | 11  |
| 26 Hedenus, M*      | 2007 | 67  | Haematological Malignancy         | Sucrose      | 100mg weekly for 6 weeks then fortnightly for 8 weeks | No iron                                    | Yes, Both                                | Y | Y | Y | Y |  | AE, Epoetin dose           | 16  |
| 27 Henry, DH        | 2007 | 187 | Oncology                          | Gluconate    | 125mg weekly for 8 weeks                              | Oral iron or no iron                       | All                                      | Y | Y | Y | Y |  | AE, SAE                    | 12  |
| 28 Hulin, S         | 2005 | 93  | Surgery - Cardiac                 | Sucrose      | 5mg/kg                                                | No iron                                    | No                                       | Y |   |   |   |  |                            | 0.7 |
| 29 Karkouti, K      | 2006 | 38  | Surgery – Cardiac and orthopaedic | Sucrose      | 200mg daily for 3 days                                | Placebo                                    | Yes but ESA group excluded from analyses | Y | Y |   |   |  |                            | 6   |
| 30 Kasper, SM       | 1998 | 128 | Surgery – autologous blood        | Gluconate    | 102.5mg                                               | Oral iron or placebo                       | No                                       | Y |   |   |   |  | AE                         | 3   |
| 31 Khalafallah, A*  | 2010 | 200 | Obstetrics                        | Polymaltose, | Formula                                               | Oral ferrous sulphate                      | No                                       | Y |   | Y |   |  | SAE                        | 24  |
| 32 Kim, YH          | 2009 | 76  | Gynecology                        | Sucrose      | 200mg alternate days until replete by formula         | Oral iron                                  | No                                       | Y |   |   |   |  | SAE                        | 3   |
| 33 Kim, YT          | 2007 | 75  | Oncology                          | Sucrose      | 200mg per dose                                        | No iron                                    | No                                       |   | Y |   |   |  | SAE, Anaphylaxis           | 6   |
| 34 Kochhar, PK      | 2012 | 100 | Obstetrics                        | Sucrose      | 200mg per dose                                        | No iron                                    | No                                       |   | Y |   |   |  | SAE, Anaphylaxis           | 6   |
| 35 Krayenbuehl, PA* | 2011 | 90  | Fatigue                           | Sucrose      | 800mg over 2 weeks. Total dose 13mg/kg                | Placebo                                    | No                                       | Y |   | Y |   |  | SAE, AE, Anaphylaxis       | 12  |
| 36 Kulnigg,         | 2008 | 200 | Gastroente                        | Carboxym     | Ganzoni                                               | Oral ferrous                               | No                                       | Y |   | Y | Y |  | AE, SAE,                   | 12  |

|                    |      |     |                  |           |                                                                      |                        |                                          |   |   |   |                                                       |    |
|--------------------|------|-----|------------------|-----------|----------------------------------------------------------------------|------------------------|------------------------------------------|---|---|---|-------------------------------------------------------|----|
| S*                 |      |     | rology           | altose    | formula max per dose 1000mg or 15mg/kg                               | sulphate               |                                          |   |   |   | Anaphylaxis, QOL                                      |    |
| 37 Li, H (1)       | 2008 | 46  | Renal            | Sucrose   | 200mg weekly for 4 weeks then fortnightly                            | Oral ferrous succinate | Yes, Both                                | Y |   | Y | AE, Anaphylaxis                                       | 8  |
| 38 Li, H (2)       | 2008 | 136 | Renal            | Sucrose   | 100mg twice weekly for 8 weeks                                       | Oral ferrous succinate | Yes, Both                                | Y |   |   | AE, SAE                                               | 12 |
| 39 Li, H (3)       | 2009 | 194 | Renal            | Sucrose   | 200mg weekly for 4 weeks then either 100 or 200mg weekly for 8 weeks | Oral ferrous succinate | Yes,, Both                               | Y |   |   | Iron studies, ESA requirement, AE, Cost-effectiveness | 12 |
| 40 Lindgren, S*    | 2009 | 91  | Gastroenterology | Sucrose   | Ganzoni formula, 200mg weekly till replete. Mean dose 1708 mg        | Oral ferrous sulphate  | No                                       | Y |   |   | Iron studies, AE                                      | 20 |
| 41 Maccio, A       | 2010 | 148 | Oncology         | Gluconate | 125mg weekly                                                         | Oral iron lactoferrin  | Yes, Both                                | Y |   |   | SAE                                                   | 12 |
| 42 Macdougall, IC  | 1996 | 37  | Renal            | Dextran   | 250mg every 2 weeks                                                  | Oral iron or no iron   | All                                      | Y |   |   | Anaphylaxis, Cost                                     | 16 |
| 43 Madi-Jebara, SN | 2004 | 120 | Cardiac Surgery  | Sucrose   | Target formula, 200mg/day                                            | Placebo                | Yes but ESA group excluded from analysis | Y | Y |   | SAE, Anaphylaxis                                      | 4  |
| 44 McMahon, LP     | 2010 | 100 | Renal            | Sucrose   | 100-200mg every 2 months                                             | Oral ferrous sulphate  | No                                       | Y | Y | Y |                                                       | 52 |
| 45 Meyer, MP       | 1996 | 42  | Neonates         | Sucrose   | 6mg/kg/week                                                          | Oral ferrous lactate   | Yes,, Both                               |   | Y | Y | Epoetin dose                                          | 4  |
| 46 Na, HS          | 2011 | 113 | Orthopaedics     | Sucrose   | 200mg, one to three doses total.                                     | No iron or epoetin     | Yes, Iron group only                     | Y | Y |   |                                                       | 6  |
| 47 Neeru, S        | 2012 | 100 | Obstetrics       | Sucrose   | Formula based                                                        | Oral ferrous           | No                                       | Y |   |   |                                                       | 4  |

|                  |      |     |                        |                       |                                               |                                                                                                                   |                                     |   |   |   |   |                  |     |
|------------------|------|-----|------------------------|-----------------------|-----------------------------------------------|-------------------------------------------------------------------------------------------------------------------|-------------------------------------|---|---|---|---|------------------|-----|
| 48 Okonko, DO    | 2008 | 35  | Cardiac Failure        | Sucrose               | on target Hb 110g/l Formula                   | fumarate 300mg No iron                                                                                            | No                                  | Y |   | Y | Y | VO2 peak, SAE    | 18  |
| 49 Onken, JE,    | 2013 | 507 | Haematology            | Ferric carboxymaltose | Two doses of 15mg/kg 1 week apart             | Oral iron, ferrous sulphate 325mg three times daily                                                               | No                                  | Y |   |   | Y | SAE              | 6   |
| 50 Olijhoek, G   | 2001 | 110 | Surgery - preoperative | Saccharate            | 200mg                                         | Oral iron                                                                                                         | Yes, but excluded from metaanalysis | Y |   |   |   | SAE, anaphylaxis | 2   |
| 51 Pedrazzoli, P | 2008 | 149 | Oncology               | Gluconate             | 125mg weekly for 6 doses                      | No iron                                                                                                           | Both                                | Y | Y |   | Y | SAE, Anaphylaxis | 16  |
| 52 Pollack, A    | 2001 | 29  | Neonates               | Sucrose               | 2mg/kg                                        | Oral iron alone in one group, oral iron plus epoetin in the second group, iron IV plus epoetin in the third group | Yes                                 | Y | Y | Y | Y | AE               | 3   |
| 53 Provenzano, R | 2009 | 230 | Renal                  | Ferumoxyl             | 510mg twice within 1 week                     | Oral iron                                                                                                         | Both                                | Y |   |   | Y | SAE              | 5   |
| 54 Qunibi, WY    | 2011 | 255 | Renal                  | Carboxymaltose        | Maximum total 2000mg over 3 doses             | Oral iron                                                                                                         | Both                                | Y |   | Y |   | AE               | 8   |
| 55 Schaller, G   | 2005 | 38  | Renal                  | Sucrose               | 300mg                                         | Placebo                                                                                                           | Both                                |   |   |   |   | Anaphylaxis      | 0.1 |
| 56 Schindler, E, | 1994 | 60  | Orthopaedic            | Gluconate             | 0.75mg/kg, 3 doses two weeks apart            | Oral iron                                                                                                         | No                                  | Y |   | Y |   | SAE, Anaphylaxis | 6   |
| 57 Schroder, MD  | 2005 | 46  | Gastrointestinal       | Sucrose               | 7mg/kg initially, then 200mg 1-2 times weekly | Oral iron sulphate                                                                                                | No                                  |   |   | Y |   | SAE, Anaphylaxis | 6   |
| 58 Seid, MH      | 2008 | 291 | Obstetrics             | Carboxymaltose        | Formula – modified                            |                                                                                                                   | No                                  | Y |   |   |   | SAE, Anaphylaxis | 6   |

|                        |      |     |                                  |                |                                                  |                                                                                          |                                    |   |   |   |   |                  |    |
|------------------------|------|-----|----------------------------------|----------------|--------------------------------------------------|------------------------------------------------------------------------------------------|------------------------------------|---|---|---|---|------------------|----|
| 59 Serrano-Trenas, JA* | 2011 | 200 | Orthopaedics                     | Sucrose        | Ganzoni, weekly iron 200mg, 3 doses 2 days apart | No iron                                                                                  | No                                 |   | Y | Y | Y |                  | 4  |
| 60 Shafi, D            | 2012 | 200 | Obstetrics                       | Sucrose        | Formula based on weight and target Hb            | Oral iron, ferrous ascorbate 100mg per day                                               | No                                 | Y |   |   |   | SAE, Anaphylaxis | 6  |
| 61 Singh, H            | 2006 | 121 | Renal                            | Sucrose        | 1000mg total in divided doses                    | No iron                                                                                  | Yes, both groups                   | Y |   | Y |   | Anaphylaxis      | 10 |
| 62 Singh, K            | 1998 | 100 | Obstetrics                       | Polymaltose    | Formula, total dose                              | Oral iron fumarate                                                                       | No                                 | Y |   | Y |   | Anaphylaxis      | 12 |
| 63 Sloand, JA          | 2004 | 25  | Renal and Restless legs syndrome | Dextran        | 1000mg                                           | No iron                                                                                  | No                                 | Y |   |   |   |                  | 4  |
| 64 Spinowitz, BS       | 2008 | 304 | Renal                            | Ferrumoxyl     | 510mg, two doses                                 | Oral iron                                                                                | Both                               | Y |   |   |   | SAE              | 5  |
| 65 Steensma, DP*       | 2011 | 502 | Oncology                         | Gluconate      | 187.5mg every 3 weeks                            | Oral ferrous sulphate                                                                    | Yes, both                          | Y | Y | Y | Y | SAE              | 16 |
| 66 Stoves, J           | 2001 | 45  | Renal                            | Sucrose        | 300mg monthly                                    | Oral ferrous sulphate                                                                    | Yes, both                          | Y |   |   | Y |                  | 20 |
| 67 Toblli, JE          | 2007 | 40  | Cardiac (CCF)                    | Sucrose        | 200mg weekly                                     | Placebo                                                                                  | No                                 | Y |   |   |   |                  | 26 |
| 68 Van Iperen, CE      | 2000 | 36  | Intensive Care                   | Iron Sacharate | 20mg per dose                                    | No iron in one group, IV iron alone in second group, IV iron plus epoetin in third group | Yes but ESA excluded from analysis |   | Y |   |   | Mortality        | 3  |
| 69 Van Wyck, DB (1)    | 2007 | 361 | Obstetrics                       | Carboxymaltose | Formula, mean cumulative dose 1403mg             | Oral ferrous sulphate                                                                    | No                                 | Y |   | Y | Y | SAE              | 6  |
| 70 Van Wyck, DB (2)    | 2009 | 477 | Gynecology                       | Carboxymaltose | Formula, mean dose 1568mg                        | Oral ferrous sulphate                                                                    | No                                 | Y |   |   | Y | SAE, QoL         | 6  |
| 71 Van Wyck, DB (3)    | 2005 | 188 | Renal                            | Sucrose        | 1000mg total, divided doses over 14 days         | Oral ferrous sulphate                                                                    | Yes, Both groups                   | Y |   | Y | Y | AE               | 8  |

|                |      |     |                                                            |         |                                |                       |     |   |   |                 |    |
|----------------|------|-----|------------------------------------------------------------|---------|--------------------------------|-----------------------|-----|---|---|-----------------|----|
| 72 Verma, S    | 2011 | 150 | Obstetrics                                                 | Sucrose | 600mg                          | Oral ferrous sulphate | No  | Y |   | Anaphylaxis, AE | 4  |
| 73 Warady, BA  | 2004 | 35  | Renal                                                      | Dextran |                                | Oral iron             | Yes | Y |   | SAE             | 16 |
| 74 Weisbach, V | 1999 | 123 | Surgery – preoperative<br>Orthopaedics &<br>Cardiothoracic | Sucrose | 200mg                          | Oral iron fumarate    | No  | Y | Y |                 | 5  |
| 75 Westad, S   | 2008 | 129 | Obstetrics                                                 | Sucrose | 600mg total in 3 divided doses | Oral ferrous sulphate | No  | Y | Y | QoL             | 12 |

\*Additional supplementary data received from author
