# Supplementary material
Source: PubMed Central journal article supplement (PMC4793458)
Supplement: lite011963.ww2_default.pdf [file lite011963.ww2_default.pdf]

**Appendix 2** Risk of Bias of Included Studies [posted as supplied by author]

| <b>Name</b>    | <b>Randomisation Sequence Generation</b>                 | <b>Allocation Concealment</b>                            | <b>Blinding of Participants or Personnel</b> | <b>Blinding of Outcome Assessment</b>                   | <b>Incomplete Outcome Data</b>                                                            | <b>Selective Reporting</b>                                            | <b>Other Bias</b>                                                                                                              |
|----------------|----------------------------------------------------------|----------------------------------------------------------|----------------------------------------------|---------------------------------------------------------|-------------------------------------------------------------------------------------------|-----------------------------------------------------------------------|--------------------------------------------------------------------------------------------------------------------------------|
| 1 Adhikary, L  | Unclear. Reported only as assigned to two groups         | Unclear. No method of allocation concealment             | High. Open-label study                       | Unclear. No reporting of blinding of outcome assessment | Unclear. 90 participants included in outcome analysis but number randomised not reported  | Unclear. Primary and secondary end-points not reported in methodology | Unclear. Analysis not reported as intention-to-treat, differences in baseline Hb between groups                                |
| 2 Agarwal, R   | Low. Computer-generated randomisation schedule           | Low. Central randomisation                               | High. Open-label study.                      | Unclear. No reporting of blinding of outcome assessment | Unclear. 89 participants randomised, 75 included in intention-to-treat analysis           | Low. Data provided on all prespecified outcomes                       | Low. Intention to treat analysis, good baseline balance, administration of ESA prohibited                                      |
| 3 Aggarwal, HK | High. Patients only described as divided into two groups | High. Patients only described as divided into two groups | High. Open-label study                       | Unclear. No reporting of blinding of outcome assessment | Low. Follow up was complete                                                               | Low. Data provided on all prespecified outcomes                       | Unclear. All patients given stable dose of ESA, good baseline balance but whether analysis was intention to treat not reported |
| 4 Al, RA       | Low. Use of a computer-generated randomisation table     | Low. Use of consecutively numbered opaque envelopes      | High. Open-label study                       | Unclear. No reporting of blinding of outcome assessment | Low. Follow up was complete                                                               | Low. Data was provided on all prespecified outcomes                   | Low. Intention to treat analysis, potential effect of prior use of oral iron explored                                          |
| 5 Al-Momen, AK | High. Sequential selection                               | High. Sequential selection                               | High. Open-label study                       | Unclear. No reporting of blinding of outcome assessment | Unclear. Participant numbers differed by 7 in the two groups despite sequential selection | Unclear. List of prespecified outcomes not reported                   | Unclear. Co-interventions and whether analysis was intention to treat not described.                                           |
| 6 Allen, RP    | Unclear. Randomisation sequence generation not described | Unclear. Allocation concealment not described            | Low. Study staff and participants blinded    | Unclear. Described as independently evaluated           | Low. Outcome data not available on only 3 participants randomised                         | Low. Data was provided on all prespecified outcomes                   | Unclear. Analysis was intention to treat but co-interventions not described.                                                   |
| 7 Anker, SD    | Low. Computer-generated permuted block randomisation     | Low. Central randomisation                               | Low. Study staff and participants blinded    | Low. Outcome assessment blinded                         | Low. withdrawal of 37 participants from a total of 459 randomised                         | Low. Data was provided on all prespecified outcomes                   | Low. Analysis was intention to treat and co-interventions described                                                            |
| 8 Auerbach, M  | Unclear.                                                 | Unclear.                                                 | High. Open-                                  | Unclear. No                                             | Low. Outcome data                                                                         | Low. Data was                                                         | High. Enrolment                                                                                                                |

|                     |                                                                                                                           |                                                                                     |                                                             |                                                                                                                                                       |                                                                                                                           |                                                                                      |                                                                                                                                                                                                              |
|---------------------|---------------------------------------------------------------------------------------------------------------------------|-------------------------------------------------------------------------------------|-------------------------------------------------------------|-------------------------------------------------------------------------------------------------------------------------------------------------------|---------------------------------------------------------------------------------------------------------------------------|--------------------------------------------------------------------------------------|--------------------------------------------------------------------------------------------------------------------------------------------------------------------------------------------------------------|
| 9 Auerbach, M       | Randomisation sequence generation not described<br>Low. Randomisation list created and maintained by an independent group | Allocation concealment not described<br>Low. Allocation by central telephone system | label study<br>High. Open-label study                       | reporting of blinding of outcome assessment<br>Unclear. Study blinded for ESA whilst ongoing but unblinded after all participants completed the study | available on 155 of 157 participants randomised<br>Low. Outcome data available for 238 out of 243 participants randomised | provided on all prespecified outcomes<br>Low. Prespecified outcome measures reported | ceased before target enrolment reached due to slow recruitment<br>Unclear. Use of oral iron acceptable but not protocolised in non-IV iron group, no interaction detected between ESA and iron but power low |
| 10 Bastit, L        | Low. Randomisation sequence stratified by site                                                                            | Low. Allocation concealed using an interactive voice response system                | High. Open-label study                                      | Unclear. No reporting of blinding of outcome assessment                                                                                               | Low. Safety data analysed on all patients randomised                                                                      | Low. Data was provided on all prespecified outcomes                                  | Low. All participants received fixed dose ESA, intention to treat analysis provided                                                                                                                          |
| 11 Bayoumeu, F      | Low. Randomisation table used                                                                                             | Unclear. Allocation concealment not described                                       | High. Open-label study                                      | Unclear. No reporting of blinding of outcome assessment                                                                                               | Low. Outcome data available on 47 of 50 participants randomised                                                           | Low. Data was provided on all prespecified outcomes                                  | Low. Analysis was intention to treat, co-interventions described                                                                                                                                             |
| 12 Beck-Da-Silva, L | Unclear. Randomisation sequence generation not described                                                                  | Unclear. Allocation concealment not described                                       | Low. Participants and study personnel blinded to allocation | Unclear. No reporting of blinding of outcome assessment                                                                                               | High. Primary outcome available for 18 out of 23 participants randomised                                                  | Low. Data was provided on all prespecified outcomes                                  | High. Study terminated early with <30% of planned sample size recruited                                                                                                                                      |
| 13 Benacaiova, G    | Low. Computer-generated randomisation sequence                                                                            | Low. Consecutively numbered opaque envelopes                                        | High. Open-label study                                      | Unclear. No reporting of blinding of outcome assessment                                                                                               | High. Outcome data not available for 31 of 260 participants randomised                                                    | Low. Data was provided on all prespecified outcomes                                  | Low. Analysis was intention to treat, co-interventions described                                                                                                                                             |
| 14 Bhandal, N       | Low. Computer-generated randomisation sequence.                                                                           | Low. Consecutively numbered opaque                                                  | High. Open-label study                                      | Unclear. No reporting of blinding of outcome                                                                                                          | Low. Outcome data available in 43 out of 44 participants randomised                                                       | Low. Data was provided on all prespecified outcomes                                  | Unclear. Analysis was intention-to-treat but co-interventions were not described                                                                                                                             |

|                 |                                                                                                                               |                                                                  |                                                                                     |                                                                       |                                                                            |                                                     |                                                                                                                             |
|-----------------|-------------------------------------------------------------------------------------------------------------------------------|------------------------------------------------------------------|-------------------------------------------------------------------------------------|-----------------------------------------------------------------------|----------------------------------------------------------------------------|-----------------------------------------------------|-----------------------------------------------------------------------------------------------------------------------------|
| 15 Birregard, G | Low. Minimisation method used                                                                                                 | envelopes<br>Low. Centralised randomisation via web-based system | High. Open-label study                                                              | assessment<br>Unclear. No reporting of blinding of outcome assessment | Low. Outcome data available in 112 out of 120 participants randomised      | Low. Data was provided on all prespecified outcomes | Low. Analysis was intention-to-treat                                                                                        |
| 16 Breymann, C  | Unclear. Randomised in 2:1 ratio, stratified by country and severity of anaemia by method of sequence generation not reported | Unclear. Allocation concealment not described                    | High. Open-label study                                                              | Unclear. No reporting of blinding of outcome assessment               | Low. Outcome data available in 344 out of 349 participants randomised      | Low. Data was provided on all prespecified outcomes | Unclear. Analysis was intention-to-treat, co-interventions not reported                                                     |
| 17 Charytan, C  | Unclear. Randomisation sequence generation not described                                                                      | Unclear. Allocation concealment not described                    | High. Open-label study                                                              | Unclear. No reporting of blinding of outcome assessment               | High. 83 participants out of a total of 102 randomised completed the study | Low. Data was provided on all prespecified outcomes | Low. Analysis was intention-to-treat, participants stratified according to previous ESA use                                 |
| 18 Coyne, DW    | Low. Computer-generated randomisation scheme.                                                                                 | Low. Central randomisation                                       | High. Open-label study                                                              | Unclear. No reporting of blinding of outcome assessment               | Low. Outcome data available in 129 out of 134 participants randomised      | Low. Data was provided on all prespecified outcomes | Low. Analysis was intention-to-treat, ESA dose changes accounted for in study design                                        |
| 19 Dangsuwan, P | Low. Random table used                                                                                                        | Unclear. Allocation concealment not described                    | High. Open-label study                                                              | Unclear. No reporting of blinding of outcome assessment               | Low. Outcome data available on all 44 participants randomised              | Low. Data was provided on all prespecified outcomes | Low. Analysis was intention-to-treat, all patients received RBC transfusion according to standardised protocol              |
| 20 Edwards, TJ  | Low. Computer-generated randomisation sequence used                                                                           | Low. Sealed, sequentially numbered opaque envelopes              | Low. Participants blinded, chief investigator and perioperative clinicians blinded, | Unclear. No reporting of blinding of outcome assessment               | Low. Outcome data available for 60 out of 62 participants randomised       | Low. Data was provided on all prespecified outcomes | Low. Analysis was intention-to-treat, potential confounders collected, RBC transfusion in accordance with a strict protocol |

|                      |                                                                     |                                                      |                                                 |                                                                          |                                                                                           |                                                                                  |                                                                                                            |
|----------------------|---------------------------------------------------------------------|------------------------------------------------------|-------------------------------------------------|--------------------------------------------------------------------------|-------------------------------------------------------------------------------------------|----------------------------------------------------------------------------------|------------------------------------------------------------------------------------------------------------|
|                      |                                                                     |                                                      | investigator administering infusion not blinded |                                                                          |                                                                                           |                                                                                  |                                                                                                            |
| 21 Evstatiev, R      | Low. Randomised 1:1 according to predefined computer-generated list | Low. Sequentially numbered envelopes used            | Low. Participants blinded                       | Unclear. No reporting of blinding of outcome assessment                  | High. Outcome data not available for 52 out of 256 participants randomised                | Low. Data provided on all prespecified outcome measures                          | Unclear. Unclear whether full analysis participant set was intention-to-treat.                             |
| 22 Friel, JK         | Unclear. Randomisation sequence generation not described            | Unclear. Allocation concealment not described        | High. Open-label study                          | Unclear. No reporting of blinding of outcome assessment                  | Unclear. Outcome data available for 26 participants, total number randomised not reported | Unclear. Specific primary and secondary a priori-defined end-points not reported | Unclear. Unclear whether analysis was intention to treat and co-interventions such as ESA use not reported |
| 23 Froessler, B      | Low. 1:1 randomisation via telephone service                        | Low. Telephone service used                          | High. Open-label study                          | Low. Data were analysed by a statistician blinded to the treatment group | High. No outcome data for 77 out of 271 participants randomised                           | Low. Data provided on all prespecified outcome measures                          | Low. Intention-to-treat analysis performed, transfused patients excluded from further Hb analysis          |
| 24 Garrido-Martin, P | Low. Random number list used                                        | Low. Assigned to intervention in pharmacy department | Low. Blinding by placebo                        | Unclear. No reporting of blinding of outcome assessment                  | High. No outcome data for 51 out of 210 participants randomised                           | Unclear. Discussion states no increase in infection but data not provided        | Low. Analysis was intention-to-treat                                                                       |
| 25 Grote, L          | Low. Minimisation method used                                       | Unclear. Allocation concealment not described.       | Low. Participants and study staff blinded       | Unclear. No reporting of blinding of outcome assessment                  | Low. Outcome data available for all 60 participants randomised                            | Low. Data was provided on all prespecified outcomes                              | Unclear. Intention-to-treat analysis provided, co-interventions not described                              |
| 26 Hedenus, M        | Unclear. Randomisation sequence generation not described            | Unclear. Allocation concealment not described.       | High. Open-label study                          | Unclear. No reporting of blinding of outcome assessment                  | Low. Outcome data available for 60 of 67 participants randomised                          | Low. Data was provided on all prespecified outcomes                              | Low. Analysis included per-protocol and intention-to-treat, ESA dosing accounted for                       |
| 27 Henry, DH         | Low. Central randomisation                                          | Low. Central randomisation                           | High. Open-label study                          | Unclear. No reporting of blinding of                                     | Low. Safety population evaluated with 187 out of 189 participants                         | Low. Data was provided on all prespecified outcomes                              | Low. Analysis included per-protocol and intention-to-treat,                                                |

|                |                                                           |                                                     |                                           |                                                         |                                                                                                               |                                                                                 |                                                                                                              |
|----------------|-----------------------------------------------------------|-----------------------------------------------------|-------------------------------------------|---------------------------------------------------------|---------------------------------------------------------------------------------------------------------------|---------------------------------------------------------------------------------|--------------------------------------------------------------------------------------------------------------|
|                |                                                           |                                                     |                                           | outcome assessment                                      | randomised                                                                                                    |                                                                                 | oral iron, ESA dosing and RBC transfusion accounted for in methodology                                       |
| 28 Hulin, S    | Unclear. Randomisation sequence generation not described  | Unclear. Allocation concealment not described.      | High. Open-label study                    | Unclear. No reporting of blinding of outcome assessment | Low. Outcome data available on 47 of 50 participants randomised                                               | Unclear. Specific primary and secondary a priori-defined endpoints not reported | Unclear. Analysis not reported as intention-to-treat, co-interventions not described                         |
| 29 Karkouti, K | Low. Computer-generated randomisation sequence used       | Low. Sequentially numbered sealed, opaque envelopes | Low. Participants and study staff blinded | Unclear. No reporting of blinding of outcome assessment | Low. Outcome data missing for 7 of 38 participants randomised                                                 | Low. Data was provided on all prespecified outcomes                             | Unclear. Analysis was intention-to-treat, transfusion guidelines provided but co-interventions not described |
| 30 Kasper, SM  | Unclear. Randomisation sequence described as blocks of 5  | Unclear. Allocation concealment not described.      | Low. Participants and study staff blinded | Unclear. No reporting of blinding of outcome assessment | Low. Outcome data available for 108 out of 128 participants randomised                                        | Low. Data was provided on all prespecified outcomes                             | Unclear. Analysis not reported as intention-to-treat, co-interventions not described                         |
| 31 Khalafallah | Low. Randomised in blocks of 10                           | Low. Assignment performed by pharmacy department    | High. Open-label study                    | Unclear. No reporting of blinding of outcome assessment | Low. Outcome data available for 183 out of 200 participants randomised                                        | Low. Data was provided on all prespecified outcomes                             | Unclear. Analysis was intention-to-treat but co-interventions not described                                  |
| 32 Kim, YH     | Low. Computer-generated randomisation sequence            | Unclear. Allocation concealment not described       | High. Open-label study                    | Unclear. No reporting of blinding of outcome assessment | Low. Outcome data missing for 20 out of 76 participants enrolled but safety data analysed on all participants | Unclear. No secondary outcomes measures reported as pre-specified               | Unclear. Analysis not reported as intention-to-treat, co-interventions not described                         |
| 33 Kim, YT     | Unclear. Randomisation sequence generation not described. | Low. Envelope procedure described                   | High. Open-label study                    | Unclear. No reporting of blinding of outcome assessment | Unclear. Number of participants randomised not reported                                                       | Unclear. A-priori endpoints not reported                                        | Unclear. Protocol for RBC transfusion provided, analysis not reported as intention-to-treat                  |
| 34 Kochhar, PK | Low. Randomisation table used                             | Unclear. Allocation concealment not described       | High. Open-label study                    | Unclear. No reporting of blinding of outcome assessment | Low. Outcome data available for 98 out of 100 participants randomised                                         | Low. Data was provided on all prespecified outcomes                             | Unclear. Analysis not reported as intention-to-treat, co-interventions not                                   |

|                    |                                                            |                                                            |                                           |                                                                   |                                                                        |                                                                                     |                                                                                                                 |
|--------------------|------------------------------------------------------------|------------------------------------------------------------|-------------------------------------------|-------------------------------------------------------------------|------------------------------------------------------------------------|-------------------------------------------------------------------------------------|-----------------------------------------------------------------------------------------------------------------|
| 35 Krayenbuehl, PA | Low. Randomisation schedule generated by external provider | Low. Randomisation schedule generated by external provider | Low. participants and study staff blinded | assessment<br>Low. Investigators blinded to study group           | Low. Outcome data available on all 90 participants randomised          | Low. Data was provided on all prespecified outcomes                                 | described<br>Low. Intention-to-treat analysis conducted                                                         |
| 36 Kulnigg, S      | Low. Randomisation schedule generated by external provider | Low. Central randomisation system                          | High. Open-label study                    | Unclear. No reporting of blinding of outcome assessment           | Low. Outcome data available for 196 out of 200 participants randomised | Low. Data was provided on all prespecified outcomes, no post-hoc analyses performed | Low. Intention-to-treat analysis conducted, co-interventions described                                          |
| 37 Li, H (1)       | Low. Computer-generated randomisation sequence             | Unclear. Allocation concealment not described.             | High. Open-label study                    | Unclear. No reporting of blinding of outcome assessment           | Low. Outcome data available for all 46 participants randomised         | Unclear. Clearly defined a-priori endpoints not reported                            | Uncertain. Titration of ESA allowed but not reported as an outcome, analysis not reported as intention-to-treat |
| 38 Li, H (2)       | Low. Computer-generated random number list used            | Unclear. Allocation concealment not described.             | High. Open-label study                    | Unclear. No reporting of blinding of outcome assessment           | Low. Outcome data available for all 136 participants randomised        | Unclear. Clearly defined a-priori secondary end-points not reported.                | Uncertain. Titration of ESA allowed but not reported as an outcome, analysis not reported as intention-to-treat |
| 39 Li, H (3)       | Low. Computer-generated randomisation sequence             | Unclear. Allocation concealment not described.             | High. Open-label study                    | Unclear. No reporting of blinding of outcome assessment           | Low. Outcome data available for all 194 participants randomised        | Unclear. Clearly defined a-priori secondary end-points not reported                 | Uncertain. Titration of ESA allowed but not reported as an outcome, analysis not reported as intention-to-treat |
| 40 Lindgren, S     | Low. Minimisation method used.                             | Low. Internet used for allocation to treatment arm         | High. Open-label study                    | Unclear. final assessment done from computerized information only | Unclear. 13 participants out of total of 91 randomised were withdrawn  | Low. Data was provided on all prespecified outcomes                                 | Low. Intention-to-treat analysis performed, co-intervention data collected                                      |
| 41 Maccio, A       | Unclear. Sequence generation not described                 | Unclear. Randomisation 1:1 but allocation                  | High. Open-label study                    | Unclear. No reporting of blinding of outcome                      | Low. Outcome data available for all 148 participants randomised        | Low. Data was provided on all prespecified outcomes                                 | Low. Study design controlled for co-interventions                                                               |

|                    |                                                                    |                                                            |                                           |                                                         |                                                                        |                                                                                                    |                                                                                                              |
|--------------------|--------------------------------------------------------------------|------------------------------------------------------------|-------------------------------------------|---------------------------------------------------------|------------------------------------------------------------------------|----------------------------------------------------------------------------------------------------|--------------------------------------------------------------------------------------------------------------|
|                    |                                                                    | concealment not described                                  |                                           | assessment                                              |                                                                        |                                                                                                    |                                                                                                              |
| 42 Macdougall, IC  | Unclear. Randomisation sequence generation not described           | Unclear. Allocation concealment not described              | High. Open-label study                    | Unclear. No reporting of blinding of outcome assessment | Low. Outcome data available for 37 out of 38 participants randomised   | Unclear. Principle end-points provided but without specifics, e.g. 'iron status'                   | Uncertain. Analysis not reported as intention-to-treat                                                       |
| 43 Madi-Jebara, SN | Unclear. Randomisation sequence generation not described           | Unclear. Allocation concealment not described              | Low. Participants and study staff blinded | Unclear. No reporting of blinding of outcome assessment | Low. Outcome data available for all 120 study participants             | Low. Data was provided on all prespecified outcomes                                                | Low. Participants receiving RBC transfusion excluded from further analysis                                   |
| 44 McMahon, LP     | Low. Block randomisation                                           | Unclear. Allocation concealment not described              | High. Open-label study                    | Unclear. No reporting of blinding of outcome assessment | High. Outcome data available for 85 out of 100 participants enrolled   | Low. Data was provided on all prespecified outcomes                                                | Unclear. 6 oral iron group patients received infrequent IV iron, analysis not reported as intention-to-treat |
| 45 Meyer, MP       | Unclear. Randomisation sequence generation not described           | Unclear. Allocation concealment not described              | High. Open-label study                    | Unclear. No reporting of blinding of outcome assessment | Low. Outcome data available for 39 out of 42 participants randomised   | Uncertain. Specific, a priori end-points not reported                                              | Unclear. Analysis not described as intention-to-treat                                                        |
| 46 Na, HS          | Unclear. Randomisation sequence generation not described.          | Low. Sealed envelopes used                                 | High. Open-label study                    | Unclear. No reporting of blinding of outcome assessment | Low. Outcome data available for 108 out of 113 participants randomised | Low. Data was provided on all prespecified outcomes                                                | Low. RBC transfusion guideline used                                                                          |
| 47 Neeru, S        | Unclear. Block randomisation but no further description of methods | Unclear. No description of allocation concealment          | High. Open-label study                    | Unclear. No blinding reported of outcome assessment     | Low. Outcome data available for 89 out of 100 participants randomised  | Unclear. RBC transfusion reported only for one group, unclear whether primary outcome prespecified | Unclear. 6 participants crossed over from oral to IV iron                                                    |
| 48 Okonko, DO      | Low. Computer-generated randomisation in a 2:1 ratio               | Low. Treatment allocation concealed from the investigators | Low. Study investigators blinded          | Low. outcome assessment by blinded investigators        | Unclear. Outcome data available for 30 out of 35 participants          | Low. Data was provided on all prespecified outcomes                                                | Low. Missing data imputed but sensitivity analysis conducted without imputation                              |

|                  |                                                           |                                               |                                           |                                                                          |                                                                                                  |                                                                                  |                                                                                                                                     |
|------------------|-----------------------------------------------------------|-----------------------------------------------|-------------------------------------------|--------------------------------------------------------------------------|--------------------------------------------------------------------------------------------------|----------------------------------------------------------------------------------|-------------------------------------------------------------------------------------------------------------------------------------|
| 49 Olijhoek, G   | Low. randomisation schedule used, 1:1:1:1 ratio           | Unclear. Allocation concealment not described | Low. Administration of ESA blinded        | Unclear. No outcome assessment blinding reported                         | Low. Outcome data available for 107 out of 110 participants randomised                           | Low. Data was provided on all prespecified outcomes                              | Low. Analysis was intention-to-treat                                                                                                |
| 50 Onken, JE     | Low. Randomised 1:1 using interactive voice system        | Low. Use of an interactive voice system       | High. Open-label                          | Low. Composite safety events adjudicated by a blinded clinical committee | Low. Outcome data available in 495 out of 507 participants                                       | Low. Data was provided on all prespecified outcomes                              | Low. Analysis was intention-to-treat                                                                                                |
| 51 Pedrazzoli, P | Unclear. Randomisation sequence generation not described  | Low. Central randomisation                    | High. Open-label study                    | Unclear. No outcome assessment blinding reported                         | High. 33 participants out of a total of 149 randomised were exclude from per protocol population | Low. Data was provided on all prespecified outcomes                              | Unclear. Study stopped early with 149 out of 420 planned participants recruited                                                     |
| 52 Pollack, A    | Unclear. Randomisation sequence generation not described. | Low. Sequentially numbered sealed envelopes   | High. Open-label study                    | Unclear. No outcome assessment blinding reported                         | High. No outcome data for 9 out of 38 participants enrolled                                      | Unclear. Specific a priori-defined primary and secondary end-points not reported | Unclear. Characteristics of participants disqualified did not differ from those who completed study but data not provided           |
| 53 Provenzano, P | Low. Telephone system                                     | Low. Telephone system                         | Low. Open-label study                     | Unclear. No outcome assessment blinding reported                         | Low. Outcome data available for 224 out of 230 participants randomised                           | Low. Data was provided on all prespecified outcomes                              | Low. Intention-to-treat analysis conducted, safety population included all patients receiving at least one dose of study medication |
| 54 Qunibi, WY    | Low. Interactive voice-response system used.              | Low. Centralised system                       | High. Open-label study                    | Unclear. No outcome assessment blinding reported                         | Low. Outcome data available for 245 out of 255 participants randomised                           | Low. Data was provided on all prespecified outcomes                              | Unclear. Initial 2:1 randomisation ratio, changed to 1:1 due to slow recruitment                                                    |
| 55 Schaller, G   | Low. Computer-generated randomisation sequence            | Unclear. Allocation concealment not reported. | Low. Participants and study staff blinded | Low. Laboratory personnel blinded to                                     | Low. Outcome data available for all 38 participants randomised                                   | Low. Data was provided on all prespecified outcomes                              | Unclear. Potential differential use of ESA.                                                                                         |



|                       |                                                                  |                                                    |                                   |                                                                         |                                                                                  |                                                                                    |                                                                                                   |
|-----------------------|------------------------------------------------------------------|----------------------------------------------------|-----------------------------------|-------------------------------------------------------------------------|----------------------------------------------------------------------------------|------------------------------------------------------------------------------------|---------------------------------------------------------------------------------------------------|
| 56 Schindler, E       | Unclear. Randomisation sequence generation not described         | Unclear. Allocation concealment not described      | High. Open-label study            | group assignment<br>Unclear. No blinding of outcome assessment reported | Low. Outcome data available for all 60 participants randomised                   | Low. Data was provided on all prespecified outcomes                                | Unclear. Analysis not described as intention-to-treat                                             |
| 57 Schroder, MD       | Low. Computer-generated random number table                      | Unclear. Allocation concealment not described      | High. Open-label study            | Unclear. No blinding of outcome assessment reported                     | High. Outcome data not available for 11 out of 46 participants randomised        | Low. Data was provided on all prespecified outcomes                                | Unclear. Differential distribution of inflammatory bowel disease type                             |
| 58 Seid, MH           | Low. 1:1 randomisation, stratified by baseline Hb                | Unclear. Allocation concealment not described      | High. Open-label study            | Unclear. No blinding of outcome assessment reported                     | Low. All 291 participants randomised included in the intention-to-treat analysis | Low. Data was provided on all prespecified outcomes                                | Low. Analysis was intention-to-treat                                                              |
| 59 Serrano-Trenas, JA | Low. Randomisation list used with 1:1 ratio                      | Low. Sealed, opaque envelopes                      | Low outcome data assessor blinded | Unclear. No blinding of outcome assessment reported                     | Unclear. Outcome data available for 179 out of 200 participants randomised       | Low. Data was provided on all prespecified outcomes                                | Low. Analysis was intention-to-treat, protocol provided for RBC transfusion                       |
| 60 Shafi, D           | Low. Computer generated randomisation sequence                   | Low. Sequentially numbered sealed opaque envelopes | High. Open-label study            | Unclear. No blinding of outcome assessment reported                     | Low. Outcome data available on all enrolled participants                         | Low. Data provided on all prespecified outcome measures                            | Unclear. All participants analyses in group to which randomised but RBC transfusion not described |
| 61 Singh, H           | Unclear. Randomisation 2:1 but sequence generation not described | Unclear. Allocation concealment not described      | High. Open-label study            | Unclear. No blinding of outcome assessment reported                     | Low. Outcome data available for 121 out of 126 participants randomised           | Low. Data was provided on all prespecified outcomes                                | Low. Analysis was intention-to-treat                                                              |
| 62 Singh, K           | Unclear. Randomisation sequence generation not described         | Unclear. Allocation concealment not described      | High. Open-label study            | Unclear. No blinding of outcome assessment reported                     | Unclear. 100 participants randomised but number with outcome data not reported   | Unclear. Primary outcome specified but not specifics of secondary outcome measures | Unclear. 12 participants in oral iron group switched to IV iron                                   |
| 63 Sloand, JA         | Unclear. Randomisation                                           | Unclear. Allocation                                | Low. participants                 | Unclear. No blinding of                                                 | Low. Outcome data available for 23 out of                                        | Low. Data was provided on all                                                      | Unclear. Plan to recruit 30 participants                                                          |

|                     |                                                          |                                               |                                                            |                                                     |                                                                                              |                                                     |                                                                            |
|---------------------|----------------------------------------------------------|-----------------------------------------------|------------------------------------------------------------|-----------------------------------------------------|----------------------------------------------------------------------------------------------|-----------------------------------------------------|----------------------------------------------------------------------------|
|                     | sequence generation not described                        | concealment not described                     | and study staff blinded                                    | outcome assessment reported                         | 25 participants randomised                                                                   | prespecified outcomes                               | but study stopped after 25 recruited                                       |
| 64 Spinowitz, BS    | Unclear. Randomisation sequence generation not described | Unclear. Allocation concealment not described | High. Open-label study                                     | Unclear. No blinding of outcome assessment reported | Low. Outcome data available for all 304 participants randomised                              | Low. Data was provided on all prespecified outcomes | Low. Intention-to-treat analysis performed                                 |
| 65 Steensma, DP     | Low. 1:1:1 stratified randomisation                      | Low. Central allocation concealment           | Low. Patients and investigators blinded to oral or no iron | Unclear. No blinding of outcome assessment reported | Low. Outcome data available for 490 out of 502 participants randomised                       | Low. Data was provided on all prespecified outcomes | Unclear. Stopped early due to excess serious adverse events in IV iron arm |
| 66 Stoves, J        | Low. Computer-generated randomisation schedule           | Low. Computer-based allocation                | High. Open-label study                                     | Unclear. No blinding of outcome assessment reported | Low. Outcome data available for all 45 participants randomised                               | Low. Data was provided on all prespecified outcomes | Unclear. Analysis not reported as intention-to-treat                       |
| 67 Toblli, JE       | Low. Random number table used                            | Unclear. Allocation concealment not described | Low. Participants and study staff blinded                  | Low. Physicians performing echocardiography blinded | Low. Outcome data available for all 40 participants randomised                               | Low. Data was provided on all prespecified outcomes | Low. Baseline balance and co-interventions described                       |
| 68 Van Iperen, CE   | Unclear. Randomisation sequence generation not described | Unclear. Allocation concealment not described | High. Open-label study                                     | Unclear. No blinding of outcome assessment reported | Low. Outcome data available for all 36 participants enrolled                                 | Low. Data was provided on all prespecified outcomes | Low. Co-interventions described, intention-to-treat analysis performed     |
| 69 Van Wyck, DB (1) | Low. Computerised random number generation               | Low. Interactive voice-response system        | High. Open-label study                                     | Unclear. No blinding of outcome assessment reported | Low. Outcome data for safety evaluation available for 352 out of 361 participants randomised | Low. Data was provided on all prespecified outcomes | Low. Intention-to-treat analysis performed                                 |
| 70 Van Wyck, DB (2) | Low. Computerised random number generation               | Low. Interactive voice-response system        | High. Open-label study                                     | Unclear. No blinding of outcome assessment reported | Low. Outcome data for safety evaluation available for 456 out of 477 participants randomised | Low. Data was provided on all prespecified outcomes | Low. Intention-to-treat analysis performed                                 |
| 71 Van Wyck, DB (3) | Low. Computerised                                        | Low. Interactive                              | High. Open-label study                                     | Unclear. No blinding of                             | Low. Outcome data available for 182 out of                                                   | Low. Data was provided on all                       | Low. Intention-to-treat analysis                                           |

|                |                                                          |                                                                          |                        |                                                     |                                                                                           |                                                           |                                                                                                     |
|----------------|----------------------------------------------------------|--------------------------------------------------------------------------|------------------------|-----------------------------------------------------|-------------------------------------------------------------------------------------------|-----------------------------------------------------------|-----------------------------------------------------------------------------------------------------|
|                | random number generation                                 | voice-response system                                                    |                        | outcome assessment reported                         | 188 participants randomised                                                               | prespecified outcomes                                     | performed                                                                                           |
| 72 Verma, S    | Unclear. Randomisation sequence generation not described | Unclear. Allocation concealment not described                            | High. Open-label study | Unclear. No blinding of outcome assessment reported | Unclear. 150 participants included in outcome analysis but number randomised not reported | Unclear. No prespecified outcome parameters other than Hb | Unclear. Analysis not reported as intention-to-treat, co-interventions not described                |
| 73 Warady, BA  | Low. Random number table used                            | Unclear. Allocation concealment not described                            | High. Open-label study | Unclear. No blinding of outcome assessment reported | Low. Outcome data available for all 35 participants randomised                            | Low. Data was provided on all prespecified outcomes       | Unclear. 1 patient in oral iron group received IV iron, analysis not reported as intention-to-treat |
| 74 Weisbach, V | Unclear. Randomisation list used                         | High. Chronological enrollment with sequential order of trial medication | High. Open-label study | Unclear. No blinding of outcome assessment reported | High. Outcome data not available for 33 out of 123 participants randomised                | Unclear. Secondary end-points not specifically reported   | Unclear. Analysis not reported as intention-to-treat                                                |
| 75 Westad, S   | Low. Minimisation used                                   | Low. Central randomisation                                               | High. Open-label study | Unclear. No blinding of outcome assessment reported | Low. Outcome data available for 117 out of 129 participants randomised                    | Low. Data was provided on all prespecified outcomes       | Low. Intention-to-treat analysis performed                                                          |
