# Supplementary material
Source: PubMed Central journal article supplement (PMC4793458)
Supplement: lite011963.ww3_default.pdf [file lite011963.ww3_default.pdf]

**Appendix 3** Results [posted as supplied by author]

|                | <b>Baseline<br/>Hb (g/L)</b> | <b>Baseline<br/>Ferritin<br/>(mcg/L)</b> | <b>Baseline<br/>TSAT<br/>(%)</b> | <b>Hb change mean<br/>(g/l) IV iron v<br/>comparator</b> | <b>Hb change<br/>(%<br/>achieved<br/>target)</b> | <b>Transfusion (n)<br/>IV iron v<br/>comparator</b> | <b>Infection (n)</b> | <b>Mortality (n)</b> |
|----------------|------------------------------|------------------------------------------|----------------------------------|----------------------------------------------------------|--------------------------------------------------|-----------------------------------------------------|----------------------|----------------------|
| Adhikary       | 92                           | 98                                       | 16                               | 10.6 v 3.2                                               | 24.4 v 20.0                                      | —                                                   | —                    | —                    |
| Agarwal        | 106                          | 69                                       | 18                               | 2 v 4                                                    | —                                                | —                                                   | —                    | —                    |
| Aggarwal       | 60                           | 186                                      | 61                               | 43 v 27                                                  | —                                                | —                                                   | —                    | —                    |
| Al             | 98                           | 45                                       | —                                | 12 v 6                                                   | 95.6 v 62.2                                      | —                                                   | —                    | —                    |
| Al-Momen       | 76                           | 12                                       | —                                | 52 v 35                                                  | —                                                | —                                                   | —                    | —                    |
| Allen          | —                            | 32                                       | —                                | -8.9 v -4.0                                              | —                                                | —                                                   | 3/24 v 2/21          | —                    |
| Anker          | 119                          | 54                                       | 17                               | 11 v 6                                                   | 50 v 28                                          | —                                                   | 50/304 v 24/155      | —                    |
| Auerbach       | 96                           | 258                                      | 18                               | 24 v 12                                                  | 68 v 25                                          | —                                                   | —                    | 1/78 v 1/791         |
| Auerbach       | 93                           | 312                                      | —                                | 19 v 13                                                  | —                                                | 41/116 v 48/122                                     | —                    | 8/117 v 13/121       |
| Bastit         | 99                           | 279                                      | 29                               | —                                                        | 86 v 73                                          | 18/200 v 39/196                                     | —                    | 21/200 v 15/196      |
| Bayoumeu       | 96                           | 7                                        | 10                               | 11.1 v 11.0                                              | 12.5 v 17.4                                      | 0/24 v 1/23                                         | —                    | —                    |
| Beck-Da-Silva  | 112                          | 132                                      | 17                               | 10.4 v 16.9                                              | 20 v 43                                          | —                                                   | —                    | 2/10 v 0/7           |
| Benacaiova     | 108                          | —                                        | —                                | 12.2 v 12.4                                              | 80 v 75                                          | 1/110 v 1/119                                       | 9/130 v 1/130        | —                    |
| Bhandal        | 74                           | 12                                       | —                                | 11.5 v 11.2                                              | —                                                | 0/22 v 1/21                                         | —                    | —                    |
| Birgregard     | 136                          | 35                                       | —                                | —                                                        | —                                                | —                                                   | —                    | —                    |
| Breymann       | 96                           | 39                                       | 12                               | 33.7 v 32.9                                              | —                                                | 1/227 v 0/117                                       | 19/227 v 4/117       | —                    |
| Charytan       | 98                           | 114                                      | 16                               | 10 v 7                                                   | 54.2 v 31.3                                      | —                                                   | —                    | —                    |
| Coyne          | 103                          | 761                                      | 19                               | 16 v 11                                                  | 46.9 v 29.2                                      | —                                                   | 8/68 v 10/66         | 1/68 v 1/66          |
| Dangsuwan,     | 90                           | —                                        | —                                | 9 v 4                                                    | —                                                | 5/22 v 14/22                                        | —                    | —                    |
| Edwards        | 135                          | —                                        | —                                | -1.9 v -5                                                | —                                                | 2/34 v 5/26                                         | —                    | —                    |
| Evstatiev      | 136                          | 75                                       | 23                               | —                                                        | 27.2 v 40.4                                      | —                                                   | 12/105 v 8/99        | 0/105 v 0/99         |
| Friel          | —                            | —                                        | —                                | —                                                        | —                                                | —                                                   | 9/14 v 7/12          | —                    |
| Froessler      | 102                          | 9                                        | —                                | 25 v 24                                                  | —                                                | 1/101                                               | 3/97                 | 0/100 v 0/94         |
| Garrido-Martin | 139                          | 252                                      | —                                | -13 v -13                                                | —                                                | 20/54 v 27/53                                       | —                    | —                    |
| Grote          | 130                          | 20                                       | —                                | 5.5 v 1.5                                                | —                                                | —                                                   | 1/29 v 0/31          | —                    |
| Hedenus        | 103                          | 128                                      | 22                               | 28 v 16                                                  | 93 v 53                                          | 2/33 v 1/34                                         | 18/33 v 6/34         | 0/33 v 4/34          |
| Henry          | 103                          | 351                                      | 32                               | 24 v 16                                                  | 18 v 16                                          | 11/63 v 20/124                                      | 9/41 v 23/88         | —                    |
| Hulin          | 107                          | 67                                       | —                                | —                                                        | —                                                | —                                                   | —                    | —                    |
| Karkouti       | 84                           | 220                                      | —                                | 9.5 v 7.0                                                | 16.5 v 12.0                                      | 2/11 v 4/10                                         | —                    | —                    |
| Kasper         | 145                          | 162                                      | 25                               | 11.8 v 11.8                                              | —                                                | —                                                   | —                    | —                    |
| Khalafallah    | 108                          | 18                                       | 14                               | 19.2 v 12.5                                              | 84 v 71                                          | —                                                   | 0/92 v 0/92          | —                    |
| Kim            | 76                           | —                                        | —                                | —                                                        | 76.7 v 11.5                                      | —                                                   | —                    | —                    |
| Kim            | 113                          | —                                        | —                                | —                                                        | —                                                | 12/30 v 29/45                                       | —                    | —                    |

|                |     |     |    |                               |             |                 |                 |                 |
|----------------|-----|-----|----|-------------------------------|-------------|-----------------|-----------------|-----------------|
| Kochhar        | 76  | 17  |    | 57 v 36                       | —           | 0/50 v 1/50     | —               | —               |
| Krayenbueh     | 133 | 22  | 23 | 1 v 0                         | —           | —               | 10/43 v 6/47    | —               |
| Kulnigg        | 88  | 6   | 56 | 37 v 28                       | 76.5 v 68.3 | —               | 18/137 v 6/63   | —               |
| Li (1)         | 88  | 111 | 19 | 34.1 v 22.1                   | —           | —               | 0/26 v 0/20     | —               |
| Li (2)         | 81  | 193 | 22 | 39.2 v 18.6                   | 88.6 v 44.0 | —               | —               | —               |
| Li (3)         | 88  | 151 | 10 | 24.7 v 17.8                   | —           | —               | —               | —               |
| Lindgren       | 104 | 13  | 7  | —                             | 66 v 47     | —               | 12/45 v 3/46    | —               |
| Maccio         | 98  | 493 | 26 | 16 v 18                       | 50 v 56     | —               | —               | —               |
| Macdougall     | 73  | —   | 25 | 45 v 27                       | —           | —               | —               | —               |
| Madi-Jebara    | 142 | —   | —  | —                             | —           | 17/80 v 9/40    | —               | —               |
| McMahon        | 119 | 106 | 21 | 2 v 1                         | —           | —               | —               | 5/52 v 1/48     |
| Meyer          | —   | —   | —  | —                             | —           | 0/21 v 2/21     | 2/21 v 2/21     | —               |
| Na             | 121 | 76  | 21 | —                             | —           | 11/54 v 29/54   | —               | —               |
| Neeru          | 95  |     |    | 20 v 12                       | 66.7 v 61.4 | —               | —               | —               |
| Okonko         | 123 | 70  | 21 | 5 v 4                         | —           | —               | 0/24 v 1/11     | 1/24 v 0/11     |
| Onken          | 106 | 33  | 22 | 15.7 v 8.0                    | 57.0 v 29.1 | —               | —               | 0/244 v 2/251   |
| Olijhoek       | 123 | —   | —  | 2 v -1 no ESA, 15<br>v 16 ESA | —           | —               | —               | —               |
| Pedrazzoli     | 99  | 341 | 29 | —                             | 76.7 v 61.8 | 2/73 v 5/76     | —               | 4/73 v 3/76     |
| Pollack        | —   | —   | —  | -8 v -24                      | —           | —               | 2/10 v 4/19     | —               |
| Provenzano     | 106 | 350 | 16 | 10 v 5                        | 49 v 25     | —               | —               | 1/110 v 3/114   |
| Qunibi         | 100 | 108 | 15 | 10.5 v 7.0                    | 60.4 v 34.7 | —               | 20/147 v 8/103  | —               |
| Schaller       | 122 | 171 | 28 | —                             | —           | —               | —               | —               |
| Schindler      | 135 | 105 |    | —                             | —           | —               | —               | —               |
| Schroder       | 97  | 100 | 6  | 25 v 21                       | —           | —               | 2/22 v 0/24     | —               |
| Seid           | 89  | 24  | —  | 40 v 34                       | 91.4 v 66.7 | 33/100 v 41/100 | 16/100 v 13/100 | 11/100 v 10/100 |
| Serrano-Trenas | 120 | —   | —  | —                             | —           | —               | —               | —               |
| Shafi          | 79  | 8   | —  | 29 v 20                       | —           | —               | —               | —               |
| Singh          | 106 | 175 | 18 | 13 v 6                        | —           | —               | 9/75 v 9/46     | —               |
| Singh          | 84  | 8   |    | 29 v 13                       | —           | —               | 0/50 v 0/50     | —               |
| Sloand         | 111 |     | 21 | 2 v -4                        | —           | —               | —               | —               |
| Spinowitz      | 100 | 145 | 11 | 8.2 v 1.6                     | —           | —               | —               | —               |
| Steensma       | 99  | 465 | 22 | 26 v 24                       | 70 v 66     | 20/164 v 43/326 | 26/164 v 10/163 | 8/164 v 9/326   |
| Stoves         | 98  | —   | —  | —                             | -0 v 59     | —               | —               | 0/22 v 1/23     |
| Toblli         | 102 | 72  | 20 | 15 v -4                       | —           | —               | —               | —               |
| Van Iperen     | 100 | —   | —  | 13 v 10                       | —           | 5/12 v 12/12    | —               | 2/12 v 4/12     |
| Van Wyck       | 90  | 25  | 10 | —                             | 96.4 v 94.1 | —               | 24/174 v 22/178 | 1/174 v 0/178   |
| (1)            |     |     |    |                               |             |                 |                 |                 |
| Van Wyck       | 94  | 68  | 6  | —                             | 82.0 v 61.8 | —               | —               | —               |

|          |     |     |    |             |             |              |             |   |
|----------|-----|-----|----|-------------|-------------|--------------|-------------|---|
| (2)      |     |     |    |             |             |              |             |   |
| Van Wyck | 101 | 98  | 16 | 7 v 4       | 44.3 v 28.0 | —            | 2/79 v 0/82 | — |
| (3)      |     |     |    |             |             |              |             |   |
| Verma, S | 75  | —   | —  | 39 v 27     | —           | —            | —           | — |
| Warady   | 115 | 139 | 38 | -1.5 v -1.7 | —           | —            | —           | — |
| Weisbach | 144 | 163 | 25 | 5 v 6       | —           | —            | 6/30 v 5/60 | — |
| Westad   | 78  | —   | —  | 40 v 46     | —           | 4/59 v 11/70 | —           | — |
